# Supplementary material for: The importance of the TiO2/quantum dots interface in the recombination processes of quantum dot sensitized solar cells
Source: Royal Society of Chemistry journal article supplement (doi:10.1039/c3cp44719g), 2013-01-01
Supplement: c3cp44719g.pdf [file c3cp44719g.pdf]

**ELECTRONIC SUPORTTING INFORMATION**

**FOR**

**The Importance of the TiO<sub>2</sub>/Quantum Dots Interface  
in the Recombination Processes of Quantum Dot  
Sensitized Solar Cells**

Zion Tachan, Idan Hod, Menny Shalom, Larissa Grinis and Arie Zaban\*

Institute of Nanotechnology & Advanced Materials, Department of Chemistry,

Bar Ilan University, 52900 Ramat-Gan, Israel

e-mail address: [zabana@mail.biu.ac.il](mailto:zabana@mail.biu.ac.il)

The four different types of CdSe sensitized QDSSCs were electrically characterized by spectrophotometer, i-V curve and incident photon to current efficiency (IPCE).

A transmittance spectrum was recorded with Carry 500 scan UV-VIS-NIR scanning spectrophotometer (Varian, USA) in the range of 400-800 nm.

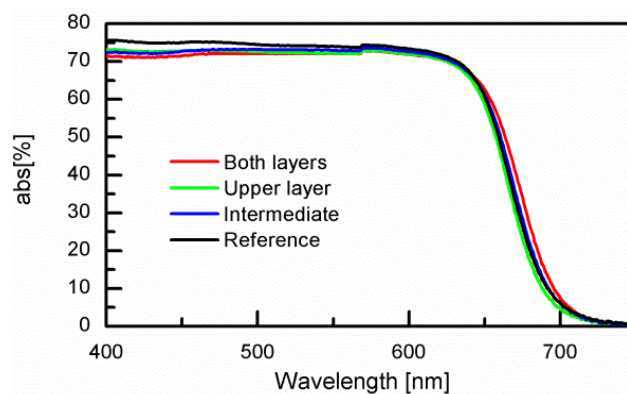

**Figure 1:** Transmittance spectrum for the four different types of MgO coated electrodes showing that the use of MgO coating does not affect the growth of the CdSe QDs on the mesoporous electrode.

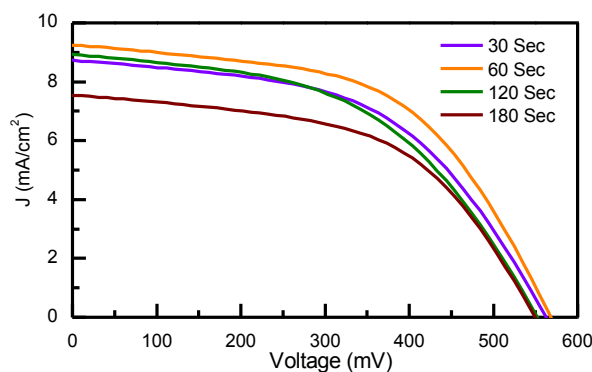

**Figure 2:** i-V curves comparison of four different types of MgO coated electrodes at different deposition durations. 60 sec (2nm) of MgO deposition exhibit the best result. Above this point there is a decrease in all parameters due to poorer electron transfer from the QDs through the MgO layer to the TiO<sub>2</sub>.

Incident photon to current efficiency (IPCE) measurements was performed employing a 250 W Xenon lamp with a monochromators and Keithley controlled by a computer.

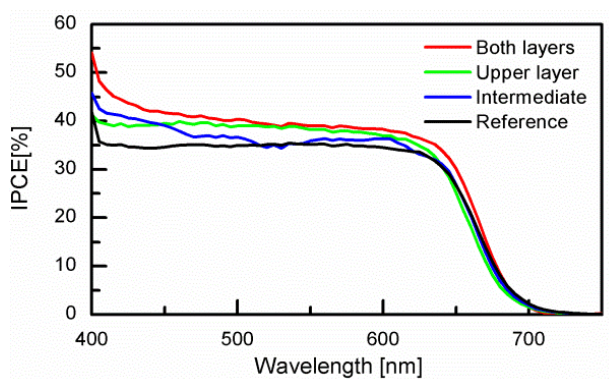

**Figure 3:** IPCE comparison of the MgO coated electrodes reveal higher photocurrents compared to the reference electrode exhibit the advantage of using the MgO coating as a recombination inhibitor.
